# Supplementary material for: Next-generation sequencing using microfluidic PCR enrichment for molecular autopsy
Source: Springer Nature journal article supplement (doi:10.1186/s12872-019-1154-8), 2019-07-23
Supplement: MOESM1 [file 16973754]

## Supplemental Material

Cases were screened for genetic variants in six known arrhythmia genes (*KCNE1*, *KCNE2*, *KCNH2*, *KCNQ1*, *RYR2* and *SCN5A*). Twenty-six variants were identified; two individuals were double heterozygotes (Table 1). Variants were named according to HGVS recommendations and Mutalyzer [1, 2] was used to ensure variants were named correctly. The ExAC Browser [3, 4] and The Exome Variant Server [5] were used to retrieve minor allele frequency data from the ExAC and GO-ESP databases, respectively (Table 2). Furthermore, all variants were submitted to the *in silico* predictions servers PolyPhen [6], SIFT [7, 8], MutationTaster [9, 10] and MutationAssessor [11]. Additionally, ClinVar classifications were extracted from ClinVar [12] (Table 2). Conservation was assessed by BLAST and CLUSTAL OMEGA (Table 3). Finally, variants were classified as either “pathogenic”, “likely pathogenic”, “benign”, “likely benign” or “uncertain significance” in line with ACMG guidelines [13] (Table 4).

Table 1: Mutations identified in cohort

| Fluidigm  | HR-ID | Gene  | HGMD ID   | dbSNP ID    | Transcript  | Coding change | Protein     | Amino Acid change | References                             |
|-----------|-------|-------|-----------|-------------|-------------|---------------|-------------|-------------------|----------------------------------------|
| 20LW00392 | 9     | RYR2  | CM097927  | rs794728721 | NM_001035.2 | c.1259G>A     | NP_001026.2 | p.R420Q           | [14-19]                                |
| 20OK02199 | 36    | RYR2  |           |             | NM_001035.2 | c.5248G>A     | NP_001026.2 | p.G1750R          |                                        |
| 20SF02201 | 38    | RYR2  | CM148846  |             | NM_001035.2 | c.13823G>A    | NP_001026.2 | p.R4608Q          | [19, 20]                               |
| 20DH02217 | 217   | KCNH2 | CM002298  | rs138776684 | NM_000238.3 | c.1039C>T     | NP_000229.1 | p.P347S           | [21-31]                                |
| 20AM00366 | 306   | RYR2  | CM056049  | rs794728756 | NM_001035.2 | c.7202G>A     | NP_001026.2 | p.R2401H          | [15, 32-34]                            |
| 20AM02224 | 314   | KCNE1 |           | rs75610894  | NM_000219.5 | c.142C>T      | NP_000210.2 | p.L48F            |                                        |
| 20DE02235 | 403   | RYR2  |           |             | NM_001035.2 | c.10681C>G    | NP_001026.2 | p.L3561V          | [19]                                   |
| 20DE02243 | 411   | KCNH2 |           |             | NM_000238.3 | c.2564G>A     | NP_000229.1 | p.S855N           |                                        |
| 20ML02281 | 703   | RYR2  |           | rs117180147 | NM_001035.2 | c.10231-4T>C  |             |                   |                                        |
| 20NF02286 | 708   | RYR2  | CM1515197 | rs201500134 | NM_001035.2 | c.8162T>C     | NP_001026.2 | p.I2721T          | [35]                                   |
|           |       | SCN5A | CM004144  | rs45489199  | NM_198056.2 | c.6016C>G     | NP_932173.1 | p.P2006A          | [27, 28, 36-49]                        |
| 20NX02292 | 714   | KCNH2 | CM057119  | rs199473017 | NM_000238.3 | c.2903C>T     | NP_000229.1 | p.P968L           | [21, 25, 50]                           |
| 20OE02293 | 715   | RYR2  |           | rs117180147 | NM_001035.2 | c.10231-4T>C  |             |                   |                                        |
| 20PU02300 | 722   | RYR2  |           | rs117180147 | NM_001035.2 | c.10231-4T>C  |             |                   |                                        |
| 20PJ02303 | 725   | RYR2  |           | rs766802574 | NM_001035.2 | c.458C>T      | NP_001026.2 | p.T153I           | [19]                                   |
| 20PT02305 | 727   | SCN5A |           | rs72549411  | NM_198056.2 | c.2437-5C>A   |             |                   |                                        |
| 20PZ02309 | 731   | RYR2  |           | rs117180147 | NM_001035.2 | c.10231-4T>C  |             |                   |                                        |
| 20QW02316 | 738   | SCN5A | CM086913  | rs41311117  | NM_198056.2 | c.6010T>C     | NP_932173.1 | p.F2004L          | [36-38, 45, 48, 51-55]                 |
| 20SF02323 | 745   | RYR2  |           | rs117180147 | NM_001035.2 | c.10231-4T>C  |             |                   |                                        |
| 20TG02324 | 746   | SCN5A | CM034060  | rs36210423  | NM_198056.2 | c.1715C>A     | NP_932173.1 | p.A572D           | [1, 28, 41, 55-61]                     |
|           |       | RYR2  |           | rs117180147 | NM_001035.2 | c.10231-4T>C  |             |                   |                                        |
| 20LT02271 | 756   | KCNE2 | CM003449  | rs2234916   | NM_172201.1 | c.22A>G       | NP_751951.1 | p.T8A             | [1, 3, 5-7, 30, 31, 47, 61-63]         |
| 20DN02274 | 759   | RYR2  | CM024349  | rs794728777 | NM_001035.2 | c.11836G>A    | NP_001026.2 | p.G3946S          | [12, 15, 19, 64, 65]                   |
| 20SH00345 | 907   | KCNQ1 | CM139859  | rs794728567 | NM_000218.2 | c.969G>A      | NP_000209.2 | p.W323*           | [19]                                   |
| 20SH00347 | 910   | KCNQ1 |           | rs199472783 | NM_000218.2 | c.1379G>A     | NP_000209.2 | p.G460D           |                                        |
| 20SH00351 | 914   | RYR2  |           | rs377763795 | NM_001035.2 | c.7458T>G     | NP_001026.2 | p.H2486Q          |                                        |
| 20SH00353 | 916   | RYR2  |           | rs397516546 | NM_001035.2 | c.5825T>G     | NP_001026.2 | p.F1942C          |                                        |
| 20AS02332 | 998   | KCNH2 | CM057124  | rs199473420 | NM_000238.3 | c.211G>C      | NP_000229.1 | p.G71R            | [50, 66]                               |
| 20SC02339 | 1006  | KCNQ1 | CM078293  | rs12720457  | NM_000218.2 | c.1179G>C     | NP_000209.2 | p.K393N           | [1, 21, 24, 25, 50, 67-71]             |
| 20BA02345 | 1012  | KCNQ1 |           | rs794728542 | NM_000218.2 | c.1829C>A     | NP_000209.2 | p.T610N           |                                        |
| 20KP02366 | 1034  | SCN5A | CM033019  | rs45620037  | NM_198056.2 | c.659C>T      | NP_932173.1 | p.T220I           | [9, 21, 23, 34, 46, 47, 53, 54, 72-78] |

Table 2: population frequency, in silico predictions and ClinVar classification of genetic variants

| Transcript change | Amino Acid change | Minor Allele Frequency (%) |              |             |             | in silico prediction |                 |                  |           | ClinVar                                                             |
|-------------------|-------------------|----------------------------|--------------|-------------|-------------|----------------------|-----------------|------------------|-----------|---------------------------------------------------------------------|
|                   |                   | ExAC                       | GO-ESP (ALL) | GO-ESP (AA) | GO-ESP (EA) | Polyphen             | MutationTaster  | MutationAssessor | Sift      |                                                                     |
| <b>KCNE1</b>      |                   |                            |              |             |             |                      |                 |                  |           |                                                                     |
| c.142C>T          | p.L48F            | 0.004                      | 0.015        | 0.000       | 0.023       | probably damaging    | disease causing | medium impact    | Damaging  |                                                                     |
| <b>KCNE2</b>      |                   |                            |              |             |             |                      |                 |                  |           |                                                                     |
| c.22A>G           | p.T8A             | 0.380                      | 0.492        | 0.114       | 0.686       | probably damaging    | disease causing | medium impact    | Damaging  | benign                                                              |
| <b>KCNH2</b>      |                   |                            |              |             |             |                      |                 |                  |           |                                                                     |
| c.211G>C          | p.G71R            | NA                         | NA           | NA          | NA          | probably damaging    | disease causing | medium impact    | Damaging  | pathogenic, Congenital long QT syndrome, autosomal dominant         |
| c.1039C>T         | p.P347S           | 0.141                      | 0.046        | 0.000       | 0.070       | possibly damaging    | disease causing | low impact       | Tolerated |                                                                     |
| c.2564G>A         | p.S855N           | NA                         | NA           | NA          | NA          | benign               | disease causing | neutral          | Tolerated |                                                                     |
| c.2903C>T         | p.P968L           | 0.004                      | 0.008        | 0.000       | 0.012       | benign               | polymorphism    | neutral          | Tolerated |                                                                     |
| <b>KCNQ1</b>      |                   |                            |              |             |             |                      |                 |                  |           |                                                                     |
| c.969G>A          | p.W323*           | NA                         | NA           | NA          | NA          |                      | disease causing |                  | Tolerated | pathogenic, ...                                                     |
| c.1179G>C         | p.K393N           | 0.110                      | NA           | NA          | NA          | possibly damaging    | disease causing | medium impact    | Tolerated |                                                                     |
| c.1379G>A         | p.G460D           | 0.006                      | NA           | NA          | NA          | benign               | polymorphism    | neutral          | Tolerated | variant of uncertain significance, sudden infant death syndrome,    |
| c.1829C>A         | p.T610N           | NA                         | NA           | NA          | NA          | possibly damaging    | disease causing | low impact       | Tolerated | variant of unknown significance                                     |
| <b>RYR2</b>       |                   |                            |              |             |             |                      |                 |                  |           |                                                                     |
| c.458C>T          | p.T153I           | 0.002                      | NA           | NA          | NA          | probably damaging    | disease causing | low impact       | Damaging  | variant of unknown significance                                     |
| c.1259G>A         | p.R420Q           | NA                         | NA           | NA          | NA          | probably damaging    | disease causing | medium impact    | Damaging  |                                                                     |
| c.5248G>A         | p.G1750R          | NA                         | NA           | NA          | NA          | probably damaging    | disease causing | medium impact    | Damaging  |                                                                     |
| c.5825T>G         | p.F1942C          | 0.003                      | NA           | NA          | NA          | benign               | disease causing | medium impact    | Tolerated | variant of unknown significance                                     |
| c.7202G>A         | p.R2401H          | NA                         | NA           | NA          | NA          | probably damaging    | disease causing | medium impact    | Damaging  | pathogenic/likely pathogenic, CPVT / cardiovascular phenotype,      |
| c.7458T>G         | p.H2486Q          | 0.001                      | 0.008        | 0.000       | 0.012       | possibly damaging    | disease causing | low impact       | Tolerated |                                                                     |
| c.8162T>C         | p.I2721T          | 0.057                      | 0.052        | 0.056       | 0.050       | possibly damaging    | disease causing | low impact       | Tolerated | variant of unknown significance, CPVT                               |
| c.10231-4T>C      |                   | 0.115                      | 0.017        | 0.055       | 0.000       | unknown              |                 |                  |           |                                                                     |
| c.10681C>G        | p.L3561V          | NA                         | NA           | NA          | NA          | possibly damaging    | disease causing | medium impact    | Damaging  |                                                                     |
| c.11836G>A        | p.G3946S          | NA                         | NA           | NA          | NA          | probably damaging    | disease causing | medium impact    | Damaging  | pathogenic, ...                                                     |
| c.13823G>A        | p.R4608Q          | NA                         | NA           | NA          | NA          | probably damaging    | disease causing | medium impact    | Tolerated |                                                                     |
| <b>SCN5A</b>      |                   |                            |              |             |             |                      |                 |                  |           |                                                                     |
| c.659C>T          | p.T220I           | 0.101                      | 0.032        | 0.000       | 0.048       | probably damaging    | disease causing | medium impact    | Damaging  | Benign/Likely benign/Pathogenic/Uncertain significance, SSS/DCM/BrS |
| c.1715C>A         | p.A572D           | 0.430                      | 0.169        | 0.025       | 0.239       | benign               | polymorphism    | low impact       | Tolerated | benign/likely benign, LQT/BrS/SSS/LVNC/PFHB/DCM                     |
| c.6010T>C         | p.F2004L          | 0.202                      | NA           | NA          | NA          | benign               | polymorphism    | neutral          | Tolerated | benign/likely benign/variant of uncertain significance, BrS/LQT     |
| c.6016C>G         | p.P2006A          | 0.134                      | 0.113        | 0.025       | 0.155       | benign               | polymorphism    | neutral          | Tolerated | likely benign/uncertain significance, BrS                           |
| c.2437-5C>A       |                   | 0.035                      | 0.054        | 0.023       | 0.070       | unknown              |                 |                  |           |                                                                     |

Table 3: HGMD classification and conservation summary

| Transcript change | Amino Acid change | HGMD Variant Classification     | Conservation                                                                                                                                                                                                                                                                                                                                                                                   |
|-------------------|-------------------|---------------------------------|------------------------------------------------------------------------------------------------------------------------------------------------------------------------------------------------------------------------------------------------------------------------------------------------------------------------------------------------------------------------------------------------|
| <b>KCNE1</b>      |                   |                                 |                                                                                                                                                                                                                                                                                                                                                                                                |
| c.142C>T          | p.L48F            |                                 | p.L48F - "L" is 94% conserved among 17 species: 100% conserved among 14 mammalian species and 67% conserved among 3 non-mammalian species. Carp carry a "C" at this residue. The 21 amino acids surrounding the residue were 87 % conserved in 14 mammalian species and 45 % conserved in 3 non-mammalian species.                                                                             |
| <b>KCNE2</b>      |                   |                                 |                                                                                                                                                                                                                                                                                                                                                                                                |
| c.22A>G           | p.T8A             | Disease-associated polymorphism | p.T8A -" T" is 100% conserved across 60 species. The 21 amino acids surrounding this residue are 79% conserved across 56 mammalian species and 56% conserved across 4 non-mammalian species.                                                                                                                                                                                                   |
| <b>KCNH2</b>      |                   |                                 |                                                                                                                                                                                                                                                                                                                                                                                                |
| c.211G>C          | p.G71R            | Disease causing mutation        | p.G71R - "G" is 100% conserved across 45 species. The 21 amino acids surrounding this residue are 100% conserved in 40 mammalian species and 86% conserved among 6 non-mammalian species.                                                                                                                                                                                                      |
| c.1039C>T         | p.P347S           | Disease causing mutation        | p.P347S - "P" is conserved 100% across 48 mammalian species, this residue is not conserved in 8 non-mammalian species, and however, no species carried an "S". The 21 amino acids surrounding this residue are 99% conserved in 48 mammalian species and 65 % conserved in 8 non-mammalian species                                                                                             |
| c.2564G>A         | p.S855N           |                                 | p.S855N - "S" is 65% conserved among 20 species: 100% conserved among 10 mammalian species and 30% conserved among 10 non-mammalian species. Carp, Zebrafish, Chicken, Croaker, Pufferfish, Arowana fish, and King Cobra carry an "N" at this residue. The 21 amino acids surrounding the residue were 100 % conserved in 10 mammalian species and 89 % conserved in 10 non-mammalian species. |
| c.2903C>T         | p.P968L           | Disease causing mutation        | p.P968L - "P" is 100% conserved in mammalian species and the 21 amino acids surrounding the residue are 87 % conserved in 28 mammalian species                                                                                                                                                                                                                                                 |
| <b>KCNQ1</b>      |                   |                                 |                                                                                                                                                                                                                                                                                                                                                                                                |
| c.969G>A          | p.W323*           | Disease causing mutation        |                                                                                                                                                                                                                                                                                                                                                                                                |
| c.1179G>C         | p.K393N           | Disease causing mutation        | p.K393N - "K" is 100% conserved in 17 non-mammalian species and 98% conserved in 48 mammalian species. Domestic Cat carries "N" at this position. The 21 amino acids surrounding this residue are 85% conserved in 48 mammalian species and 80% conserved in 17 non-mammalian species.                                                                                                         |
| c.1379G>A         | p.G460D           |                                 | p.G460D - "G" is 30% conserved among 30 species (81% among 11 mammalian species), no species carried a D at this position. The 21 amino acids surrounding this residue are 49% conserved in 19 non-mammalian species and 84% conserved in 11 mammalian species.                                                                                                                                |
| c.1829C>A         | p.T610N           |                                 | p.T610N - "T" 91% conserved in 12 species (100% among 9 mammalian species). The 21 amino acids surrounding this residue were 92% conserved among 9 mammalian species and 52 % conserved among non-mammalian species.                                                                                                                                                                           |
| <b>RYR2</b>       |                   |                                 |                                                                                                                                                                                                                                                                                                                                                                                                |
| c.458C>T          | p.T153I           |                                 | p.T153I - "T" is conserved in 77% of 22 species (90% among 10 mammalian species), no species carried and "I" at this position. The 21 amino acids surrounding the residue were 97.6% in 12 non-mammalian species and 99.5% in 10 mammalian species.                                                                                                                                            |
| c.1259G>A         | p.R420Q           | Disease causing mutation        | p.R420Q - "R" is 100% conserved in all species identified by BLAST search. The 21 amino acids surrounding this residue were 100% conserved in 57 mammalian species ad 92% conserved in 20 non-mammalian species.                                                                                                                                                                               |
| c.5248G>A         | p.G1750R          |                                 | p.G1750R - "G" is conserved 100% in 21 species. The 21 amino acids surrounding this residue were 96.1% conserved in 11 non-mammalian species and 94.3% conserved in 10 mammalian species.                                                                                                                                                                                                      |
| c.5825T>G         | p.F1942C          |                                 | p.F1942C - "F" is conserved 100% in 23 species. The 21 amino acids surrounding this residue were 92.3% conserved in 13 non-mammalian species and 99% conserved in 10 mammalian species.                                                                                                                                                                                                        |
| c.7202G>A         | p.R2401H          | Disease causing mutation        | p.R2401H - "R" is 100% conserved in all species identified by BLAST search. The 21 amino acids surrounding the residue were 97% conserved in 56 mammalian species and 94 % conserved in 24 non-mammalian species including Acorn worm                                                                                                                                                          |
| c.7458T>G         | p.H2486Q          |                                 | p.H2486Q - "H" is conserved 100% in 22 species. The 21 amino acids surrounding this residue were 94.8% conserved in 12non-mammalian species and 99.5% conserved in 10 mammalian species.                                                                                                                                                                                                       |
| c.8162T>C         | p.I2721T          | Disease causing mutation?       | p.I2721T -"I" is 100% conserved in all species identified by BLAST search. The 21 amino acids surrounding the residue were 99% conserved in 54 mammalian species and 97 % conserved in 21 non-mammalian species                                                                                                                                                                                |
| c.10231-4T>C      |                   |                                 |                                                                                                                                                                                                                                                                                                                                                                                                |
| c.10681C>G        | p.L3561V          |                                 | p.L3561V - "L" is conserved 100 % in 20 species. The 21 amino acids surrounding this residue were 63.2 % conserved in 10 non-mammalian species and 68.3 % conserved in mammalian species.                                                                                                                                                                                                      |
| c.11836G>A        | p.G3946S          | Disease causing mutation        | p.G3946S - "G" is 100% conserved in all species identified by BLAST search. The 21 amino acids surrounding the residue were 100 % conserved in 57 mammalian species and 100 % conserved in 22 non-mammalian species including Vase tunicate.                                                                                                                                                   |
| c.13823G>A        | p.R4608Q          | Disease causing mutation        | p.R4608Q - "R" is 100% conserved in all species identified by BLAST search. The 21 amino acids surrounding the residue were 100 % conserved in 57 mammalian species and 99 % conserved in 22 non-mammalian species including Vase tunicate.                                                                                                                                                    |
| <b>SCN5A</b>      |                   |                                 |                                                                                                                                                                                                                                                                                                                                                                                                |

|             |          |                           |                                                                                                                                                                                                                                                                                                 |
|-------------|----------|---------------------------|-------------------------------------------------------------------------------------------------------------------------------------------------------------------------------------------------------------------------------------------------------------------------------------------------|
| c.659C>T    | p.T220I  | Disease causing mutation  | p.T220I - "T" is 100% conserved in all species identified by BLAST search. The 21 amino acids surrounding the residue were 96 % conserved in 56 mammalian species and 91 % conserved in 7 non-mammalian species.                                                                                |
| c.1715C>A   | p.A572D  | Disease causing mutation? | p.A572D - "A" is 73% conserved among 52 mammalian species, the surrounding 21 amino acids are 94% conserved. No non-mammalian species were identified in a BLAST search.                                                                                                                        |
| c.2437-5C>A |          |                           |                                                                                                                                                                                                                                                                                                 |
| c.6010T>C   | p.F2004L | Disease causing mutation? | p.F2004L - "F" is 90% conserved among 51 mammalian species, the surrounding 21 amino acids are 96% conserved. No non-mammalian species were identified in a BLAST search. Long tailed chinchilla and dog, both carry "L" at this position.                                                      |
| c.6016C>G   | p.P2006A | Disease causing mutation? | p.P2006A - "P" is 84% conserved among 51 mammalian species, the surrounding 21 amino acids are 91% conserved. No non-mammalian species were identified in a BLAST search. Domestic guinea pig, domestic cat, Brandt's bat, mouse-eared bat and little brown bat all carry "A" at this position. |

Table 4: Variant classification

| HGMD ID                                | dbSNP ID    | Transcript change | Amino Acid change | Classification         |
|----------------------------------------|-------------|-------------------|-------------------|------------------------|
| <b>KCNE1 (NM_000219.5/NP_000210.2)</b> |             |                   |                   |                        |
|                                        | rs75610894  | c.142C>T          | p.L48F            | Uncertain significance |
| <b>KCNE2 (NM_172201.1/NP_751951.1)</b> |             |                   |                   |                        |
| CM003449                               | rs2234916   | c.22A>G           | p.T8A             | Uncertain significance |
| <b>KCNH2 (NM_000238.3/NP_000229.1)</b> |             |                   |                   |                        |
| CM057124                               | rs199473420 | c.211G>C          | p.G71R            | Likely pathogenic      |
| CM002298                               | rs138776684 | c.1039C>T         | p.P347S           | Uncertain significance |
|                                        |             | c.2564G>A         | p.S855N           | Uncertain significance |
| CM057119                               | rs199473017 | c.2903C>T         | p.P968L           | Uncertain significance |
| <b>KCNQ1 (NM_000218.2/NP_000209.2)</b> |             |                   |                   |                        |
| CM139859                               | rs794728567 | c.969G>A          | p.W323*           | Likely pathogenic      |
| CM078293                               | rs12720457  | c.1179G>C         | p.K393N           | Uncertain significance |
|                                        | rs199472783 | c.1379G>A         | p.G460D           | Uncertain significance |
|                                        | rs794728542 | c.1829C>A         | p.T610N           | Uncertain significance |
| <b>RYR2 (NM_001035.2 /NP_001026.2)</b> |             |                   |                   |                        |
|                                        | rs766802574 | c.458C>T          | p.T153I           | Likely pathogenic      |
| CM097927                               | rs794728721 | c.1259G>A         | p.R420Q           | Pathogenic             |
|                                        |             | c.5248G>A         | p.G1750R          | Likely pathogenic      |
|                                        | rs397516546 | c.5825T>G         | p.F1942C          | Uncertain significance |
| CM056049                               | rs794728756 | c.7202G>A         | p.R2401H          | Likely pathogenic      |
|                                        | rs377763795 | c.7458T>G         | p.H2486Q          | Uncertain significance |
| CM1515197                              | rs201500134 | c.8162T>C         | p.I2721T          | Uncertain significance |
|                                        | rs117180147 | c.10231-4T>C      |                   | Uncertain significance |
|                                        |             | c.10681C>G        | p.L3561V          | Likely pathogenic      |
| CM024349                               | rs794728777 | c.11836G>A        | p.G3946S          | Pathogenic             |
| CM148846                               |             | c.13823G>A        | p.R4608Q          | Pathogenic             |
| <b>SCN5A (NM_198056.2/NP_932173.1)</b> |             |                   |                   |                        |
| CM033019                               | rs45620037  | c.659C>T          | p.T220I           | Likely pathogenic      |
| CM034060                               | rs36210423  | c.1715C>A         | p.A572D           | Likely benign          |
|                                        | rs72549411  | c.2437-5C>A       |                   | Uncertain significance |
| CM086913                               | rs41311117  | c.6010T>C         | p.F2004L          | Uncertain significance |
| CM004144                               | rs45489199  | c.6016C>G         | p.P2006A          | Uncertain significance |

## References

- [1] Mank-Seymour AR, Richmond JL, Wood LS, Reynolds JM, Fan YT, Warnes GR, Milos PM, Thompson JF. Association of torsades de pointes with novel and known single nucleotide polymorphisms in long QT syndrome genes. *Am Heart J* 2006;152:1116-22.
- [2] Wildeman M, van Ophuizen E, den Dunnen JT, Taschner PE. Improving sequence variant descriptions in mutation databases and literature using the Mutalyzer sequence variation nomenclature checker. *Hum Mutat* 2008;29:6-13.
- [3] Aydin A, Bahring S, Dahm S, Guenther UP, Uhlmann R, Busjahn A, Luft FC. Single nucleotide polymorphism map of five long-QT genes. *J Mol Med (Berl)* 2005;83:159-65.
- [4] Lek M, Karczewski KJ, Minikel EV, Samocha KE, Banks E, Fennell T, O'Donnell-Luria AH, Ware JS, Hill AJ, Cummings BB, Tukiainen T, Birnbaum DP, Kosmicki JA, Duncan LE, Estrada K, Zhao F, Zou J, Pierce-Hoffman E, Berghout J, Cooper DN, Deflaux N, DePristo M, Do R, Flannick J, Fromer M, Gauthier L, Goldstein J, Gupta N, Howrigan D, Kiezun A, Kurki MI, Moonshine AL, Natarajan P, Orozco L, Peloso GM, Poplin R, Rivas MA, Ruano-Rubio V, Rose SA, Ruderfer DM, Shakir K, Stenson PD, Stevens C, Thomas BP, Tiao G, Tusie-Luna MT, Weisburd B, Won HH, Yu D, Altshuler DM, Ardissino D, Boehnke M, Danesh J, Donnelly S, Elosua R, Florez JC, Gabriel SB, Getz G, Glatt SJ, Hultman CM, Kathiresan S, Laakso M, McCarroll S, McCarthy MI, McGovern D, McPherson R, Neale BM, Palotie A, Purcell SM, Saleheen D, Scharf JM, Sklar P, Sullivan PF, Tuomilehto J, Tsuang MT, Watkins HC, Wilson JG, Daly MJ, MacArthur DG, Exome Aggregation C. Analysis of protein-coding genetic variation in 60,706 humans. *Nature* 2016;536:285-91.
- [5] Sesti F, Abbott GW, Wei J, Murray KT, Saksena S, Schwartz PJ, Priori SG, Roden DM, George AL, Jr., Goldstein SA. A common polymorphism associated with antibiotic-induced cardiac arrhythmia. *Proc Natl Acad Sci U S A* 2000;97:10613-8.
- [6] Hedley PL, Haundrup O, Andersen PS, Aidt FH, Jensen M, Moolman-Smook JC, Bundgaard H, Christiansen M. The KCNE genes in hypertrophic cardiomyopathy: a candidate gene study. *J Negat Results Biomed* 2011;10:12.
- [7] Larsen LA, Andersen PS, Kanters J, Svendsen IH, Jacobsen JR, Vuust J, Wettrell G, Tranebjaerg L, Bathen J, Christiansen M. Screening for mutations and polymorphisms in the genes KCNH2 and KCNE2 encoding the cardiac HERG/MiRP1 ion channel: implications for acquired and congenital long Q-T syndrome. *Clin Chem* 2001;47:1390-5.
- [8] Kumar P, Henikoff S, Ng PC. Predicting the effects of coding non-synonymous variants on protein function using the SIFT algorithm. *Nat Protoc* 2009;4:1073-81.
- [9] Olson TM, Michels VV, Ballew JD, Reyna SP, Karst ML, Herron KJ, Horton SC, Rodeheffer RJ, Anderson JL. Sodium channel mutations and susceptibility to heart failure and atrial fibrillation. *JAMA* 2005;293:447-54.
- [10] Schwarz JM, Cooper DN, Schuelke M, Seelow D. MutationTaster2: mutation prediction for the deep-sequencing age. *Nat Methods* 2014;11:361-2.
- [11] Millat G, Chevalier P, Restier-Miron L, Da Costa A, Bouvagnet P, Kugener B, Fayol L, Gonzalez Armengod C, Oddou B, Chanavat V, Froidefond E, Perraudin R, Rousson R, Rodriguez-Lafrasse C. Spectrum of pathogenic mutations and associated polymorphisms in a cohort of 44 unrelated patients with long QT syndrome. *Clin Genet* 2006;70:214-27.
- [12] Kawamura M, Ohno S, Naiki N, Nagaoka I, Dochi K, Wang Q, Hasegawa K, Kimura H, Miyamoto A, Mizusawa Y, Itoh H, Makiyama T, Sumitomo N, Ushinohama H, Oyama K, Murakoshi N, Aonuma K, Horigome H, Honda T, Yoshinaga M, Ito M, Horie M. Genetic background of catecholaminergic polymorphic ventricular tachycardia in Japan. *Circ J* 2013;77:1705-13.
- [13] Richards S, Aziz N, Bale S, Bick D, Das S, Gastier-Foster J, Grody WW, Hegde M, Lyon E, Spector E, Voelkerding K, Rehm HL, Committee ALQA. Standards and guidelines for the interpretation of sequence variants: a joint consensus recommendation of the American College of Medical Genetics and Genomics and the Association for Molecular Pathology. *Genet Med* 2015;17:405-24.
- [14] Domingo D, Neco P, Fernandez-Pons E, Zissimopoulos S, Molina P, Olague J, Suarez-Mier MP, Lai FA, Gomez AM, Zorio E. Non-ventricular, Clinical, and Functional Features of the RyR2(R420Q) Mutation

Causing Catecholaminergic Polymorphic Ventricular Tachycardia. *Rev Esp Cardiol (Engl Ed)* 2015;68:398-407.

[15] Jabbari J, Jabbari R, Nielsen MW, Holst AG, Nielsen JB, Haunso S, Tfelt-Hansen J, Svendsen JH, Olesen MS. New exome data question the pathogenicity of genetic variants previously associated with catecholaminergic polymorphic ventricular tachycardia. *Circ Cardiovasc Genet* 2013;6:481-9.

[16] Kimlicka L, Tung CC, Carlsson AC, Lobo PA, Yuchi Z, Van Petegem F. The cardiac ryanodine receptor N-terminal region contains an anion binding site that is targeted by disease mutations. *Structure* 2013;21:1440-9.

[17] Medeiros-Domingo A, Bhuiyan ZA, Tester DJ, Hofman N, Bikker H, van Tintelen JP, Mannens MM, Wilde AA, Ackerman MJ. The RYR2-encoded ryanodine receptor/calcium release channel in patients diagnosed previously with either catecholaminergic polymorphic ventricular tachycardia or genotype negative, exercise-induced long QT syndrome: a comprehensive open reading frame mutational analysis. *J Am Coll Cardiol* 2009;54:2065-74.

[18] Novak A, Barad L, Lorber A, Gherghiceanu M, Reiter I, Eisen B, Eldor L, Itskovitz-Eldor J, Eldar M, Arad M, Binah O. Functional abnormalities in iPSC-derived cardiomyocytes generated from CPVT1 and CPVT2 patients carrying ryanodine or calsequestrin mutations. *J Cell Mol Med* 2015;19:2006-18.

[19] Lahrouchi N, Raju H, Lodder EM, Papatheodorou E, Ware JS, Papadakis M, Tadros R, Cole D, Skinner JR, Crawford J, Love DR, Pua CJ, Soh BY, Bhalshankar JD, Govind R, Tfelt-Hansen J, Winkel BG, van der Werf C, Wijeyeratne YD, Mellor G, Till J, Cohen MC, Tome-Esteban M, Sharma S, Wilde AAM, Cook SA, Bezzina CR, Sheppard MN, Behr ER. Utility of Post-Mortem Genetic Testing in Cases of Sudden Arrhythmic Death Syndrome. *J Am Coll Cardiol* 2017;69:2134-45.

[20] Wong LC, Roses-Noguer F, Till JA, Behr ER. Cardiac evaluation of pediatric relatives in sudden arrhythmic death syndrome: a 2-center experience. *Circ Arrhythm Electrophysiol* 2014;7:800-6.

[21] Amendola LM, Dorschner MO, Robertson PD, Salama JS, Hart R, Shirts BH, Murray ML, Tokita MJ, Gallego CJ, Kim DS, Bennett JT, Crosslin DR, Ranchalis J, Jones KL, Rosenthal EA, Jarvik ER, Itsara A, Turner EH, Herman DS, Schleit J, Burt A, Jamal SM, Abrudan JL, Johnson AD, Conlin LK, Dulik MC, Santani A, Metterville DR, Kelly M, Foreman AK, Lee K, Taylor KD, Guo X, Crooks K, Kiedrowski LA, Raffel LJ, Gordon O, Machini K, Desnick RJ, Biesecker LG, Lubitz SA, Mulchandani S, Cooper GM, Joffe S, Richards CS, Yang Y, Rotter JI, Rich SS, O'Donnell CJ, Berg JS, Spinner NB, Evans JP, Fullerton SM, Leppig KA, Bennett RL, Bird T, Sybert VP, Grady WM, Tabor HK, Kim JH, Bamshad MJ, Wilfond B, Motulsky AG, Scott CR, Pritchard CC, Walsh TD, Burke W, Raskind WH, Byers P, Hisama FM, Rehm H, Nickerson DA, Jarvik GP. Actionable exomic incidental findings in 6503 participants: challenges of variant classification. *Genome Res* 2015;25:305-15.

[22] Anderson CL, Delisle BP, Anson BD, Kilby JA, Will ML, Tester DJ, Gong Q, Zhou Z, Ackerman MJ, January CT. Most LQT2 mutations reduce Kv11.1 (hERG) current by a class 2 (trafficking-deficient) mechanism. *Circulation* 2006;113:365-73.

[23] Dorschner MO, Amendola LM, Turner EH, Robertson PD, Shirts BH, Gallego CJ, Bennett RL, Jones KL, Tokita MJ, Bennett JT, Kim JH, Rosenthal EA, Kim DS, National Heart L, Blood Institute Grand Opportunity Exome Sequencing P, Tabor HK, Bamshad MJ, Motulsky AG, Scott CR, Pritchard CC, Walsh T, Burke W, Raskind WH, Byers P, Hisama FM, Nickerson DA, Jarvik GP. Actionable, pathogenic incidental findings in 1,000 participants' exomes. *Am J Hum Genet* 2013;93:631-40.

[24] Ghouse J, Have CT, Weeke P, Bille Nielsen J, Ahlberg G, Balslev-Harder M, Appel EV, Skaaby T, Olesen SP, Grarup N, Linneberg A, Pedersen O, Haunso S, Hastrup Svendsen J, Hansen T, Kanters JK, Salling Olesen M. Rare genetic variants previously associated with congenital forms of long QT syndrome have little or no effect on the QT interval. *Eur Heart J* 2015;36:2523-9.

[25] Giudicessi JR, Kapplinger JD, Tester DJ, Alders M, Salisbury BA, Wilde AA, Ackerman MJ. Phylogenetic and physicochemical analyses enhance the classification of rare nonsynonymous single nucleotide variants in type 1 and 2 long-QT syndrome. *Circ Cardiovasc Genet* 2012;5:519-28.

[26] Jou CJ, Barnett SM, Bian JT, Weng HC, Sheng X, Tristani-Firouzi M. An in vivo cardiac assay to determine the functional consequences of putative long QT syndrome mutations. *Circ Res* 2013;112:826-30.



- [27] Novotny T, Kadlecova J, Raudenska M, Bittnerova A, Andrsova I, Florianova A, Vasku A, Neugebauer P, Kozak M, Sepsi M, Krivan L, Gaillyova R, Spinar J. Mutation analysis ion channel genes ventricular fibrillation survivors with coronary artery disease. *Pacing Clin Electrophysiol* 2011;34:742-9.
- [28] Refsgaard L, Holst AG, Sadjadieh G, Haunso S, Nielsen JB, Olesen MS. High prevalence of genetic variants previously associated with LQT syndrome in new exome data. *Eur J Hum Genet* 2012;20:905-8.
- [29] Splawski I, Shen J, Timothy KW, Lehmann MH, Priori S, Robinson JL, Moss AJ, Schwartz PJ, Towbin JA, Vincent GM, Keating MT. Spectrum of mutations in long-QT syndrome genes. KVLQT1, HERG, SCN5A, KCNE1, and KCNE2. *Circulation* 2000;102:1178-85.
- [30] Paulussen AD, Gilissen RA, Armstrong M, Doevendans PA, Verhasselt P, Smeets HJ, Schulze-Bahr E, Haverkamp W, Breithardt G, Cohen N, Aerssens J. Genetic variations of KCNQ1, KCNH2, SCN5A, KCNE1, and KCNE2 in drug-induced long QT syndrome patients. *J Mol Med (Berl)* 2004;82:182-8.
- [31] Jongbloed R, Marcelis C, Velter C, Doevendans P, Geraedts J, Smeets H. DHPLC analysis of potassium ion channel genes in congenital long QT syndrome. *Hum Mutat* 2002;20:382-91.
- [32] Aizawa Y, Ueda K, Komura S, Washizuka T, Chinushi M, Inagaki N, Matsumoto Y, Hayashi T, Takahashi M, Nakano N, Yasunami M, Kimura A, Hiraoka M, Aizawa Y. A novel mutation in FKBP12.6 binding region of the human cardiac ryanodine receptor gene (R2401H) in a Japanese patient with catecholaminergic polymorphic ventricular tachycardia. *Int J Cardiol* 2005;99:343-5.
- [33] Roux-Buisson N, Egea G, Denjoy I, Guicheney P, Lunardi J. Germline and somatic mosaicism for a mutation of the ryanodine receptor type 2 gene: implication for genetic counselling and patient caring. *Europace* 2011;13:130-2.
- [34] Walsh R, Peters NS, Cook SA, Ware JS. Paralogous annotation identifies novel pathogenic variants in patients with Brugada syndrome and catecholaminergic polymorphic ventricular tachycardia. *J Med Genet* 2014;51:35-44.
- [35] Hertz CL, Christiansen SL, Ferrero-Miliani L, Fordyce SL, Dahl M, Holst AG, Ottesen GL, Frank-Hansen R, Bundgaard H, Morling N. Next-generation sequencing of 34 genes in sudden unexplained death victims in forensics and in patients with channelopathic cardiac diseases. *Int J Legal Med* 2015;129:793-800.
- [36] Ackerman MJ, Splawski I, Makielski JC, Tester DJ, Will ML, Timothy KW, Keating MT, Jones G, Chadha M, Burrow CR, Stephens JC, Xu C, Judson R, Curran ME. Spectrum and prevalence of cardiac sodium channel variants among black, white, Asian, and Hispanic individuals: implications for arrhythmogenic susceptibility and Brugada/long QT syndrome genetic testing. *Heart Rhythm* 2004;1:600-7.
- [37] Andreasen C, Refsgaard L, Nielsen JB, Sadjadieh A, Winkel BG, Tfelt-Hansen J, Haunso S, Holst AG, Svendsen JH, Olesen MS. Mutations in genes encoding cardiac ion channels previously associated with sudden infant death syndrome (SIDS) are present with high frequency in new exome data. *Can J Cardiol* 2013;29:1104-9.
- [38] Kapplinger JD, Tester DJ, Alders M, Benito B, Berthet M, Brugada J, Brugada P, Fressart V, Guerchicoff A, Harris-Kerr C, Kamakura S, Kyndt F, Koopmann TT, Miyamoto Y, Pfeiffer R, Pollevick GD, Probst V, Zumhagen S, Vatta M, Towbin JA, Shimizu W, Schulze-Bahr E, Antzelevitch C, Salisbury BA, Guicheney P, Wilde AA, Brugada R, Schott JJ, Ackerman MJ. An international compendium of mutations in the SCN5A-encoded cardiac sodium channel in patients referred for Brugada syndrome genetic testing. *Heart Rhythm* 2010;7:33-46.
- [39] Krahn AD, Healey JS, Chauhan V, Birnie DH, Simpson CS, Champagne J, Gardner M, Sanatani S, Exner DV, Klein GJ, Yee R, Skanes AC, Gula LJ, Gollob MH. Systematic assessment of patients with unexplained cardiac arrest: Cardiac Arrest Survivors With Preserved Ejection Fraction Registry (CASPER). *Circulation* 2009;120:278-85.
- [40] Lieve KV, Williams L, Daly A, Richard G, Bale S, Macaya D, Chung WK. Results of genetic testing in 855 consecutive unrelated patients referred for long QT syndrome in a clinical laboratory. *Genet Test Mol Biomarkers* 2013;17:553-61.
- [41] Maxwell KN, Hart SN, Vijai J, Schrader KA, Slavin TP, Thomas T, Wubbenhorst B, Ravichandran V, Moore RM, Hu C, Guidugli L, Wenz B, Domchek SM, Robson ME, Szabo C, Neuhausen SL, Weitzel JN, Offit K,

Couch FJ, Nathanson KL. Evaluation of ACMG-Guideline-Based Variant Classification of Cancer Susceptibility and Non-Cancer-Associated Genes in Families Affected by Breast Cancer. *Am J Hum Genet* 2016;98:801-17.

[42] Priori SG, Napolitano C, Schwartz PJ, Bloise R, Crotti L, Ronchetti E. The elusive link between LQT3 and Brugada syndrome: the role of flecainide challenge. *Circulation* 2000;102:945-7.

[43] Shinlapawittayatorn K, Du XX, Liu H, Ficker E, Kaufman ES, Deschenes I. A common SCN5A polymorphism modulates the biophysical defects of SCN5A mutations. *Heart Rhythm* 2011;8:455-62.

[44] Skinner JR, Crawford J, Smith W, Aitken A, Heaven D, Evans CA, Hayes I, Neas KR, Stables S, Koelmeyer T, Denmark L, Vuletic J, Maxwell F, White K, Yang T, Roden DM, Leren TP, Shelling A, Love DR, Cardiac Inherited Disease Group New Z. Prospective, population-based long QT molecular autopsy study of postmortem negative sudden death in 1 to 40 year olds. *Heart Rhythm* 2011;8:412-9.

[45] Wang DW, Desai RR, Crotti L, Arnestad M, Insolia R, Pedrazzini M, Ferrandi C, Vege A, Rognum T, Schwartz PJ, George AL, Jr. Cardiac sodium channel dysfunction in sudden infant death syndrome. *Circulation* 2007;115:368-76.

[46] Norton N, Robertson PD, Rieder MJ, Zuchner S, Rampersaud E, Martin E, Li D, Nickerson DA, Hershberger RE, National Heart L, Blood Institute GOESP. Evaluating pathogenicity of rare variants from dilated cardiomyopathy in the exome era. *Circ Cardiovasc Genet* 2012;5:167-74.

[47] Sudandiradoss C, Sethumadhavan R. In silico investigations on functional and haplotype tag SNPs associated with congenital long QT syndromes (LQTSs). *Genomic Med* 2008;2:55-67.

[48] Arnestad M, Crotti L, Rognum TO, Insolia R, Pedrazzini M, Ferrandi C, Vege A, Wang DW, Rhodes TE, George AL, Jr., Schwartz PJ. Prevalence of long-QT syndrome gene variants in sudden infant death syndrome. *Circulation* 2007;115:361-7.

[49] Hofman-Bang J, Behr ER, Hedley P, Tfelt-Hansen J, Kanters JK, Haunsoe S, McKenna WJ, Christiansen M. High-efficiency multiplex capillary electrophoresis single strand conformation polymorphism (multi-CE-SSCP) mutation screening of SCN5A: a rapid genetic approach to cardiac arrhythmia. *Clin Genet* 2006;69:504-11.

[50] Napolitano C, Priori SG, Schwartz PJ, Bloise R, Ronchetti E, Nastoli J, Bottelli G, Cerrone M, Leonardi S. Genetic testing in the long QT syndrome: development and validation of an efficient approach to genotyping in clinical practice. *JAMA* 2005;294:2975-80.

[51] Bebarova M, O'Hara T, Geelen JL, Jongbloed RJ, Timmermans C, Arens YH, Rodriguez LM, Rudy Y, Volders PG. Subepicardial phase 0 block and discontinuous transmural conduction underlie right precordial ST-segment elevation by a SCN5A loss-of-function mutation. *Am J Physiol Heart Circ Physiol* 2008;295:H48-58.

[52] Bokeria LA, Revishvili A, Pronicheva IV, Zakliaz'minskaia EV, Poliakov AV. [The clinical variability of and approaches to treatment of life-threatening ventricular arrhythmias caused by SCN5A gene mutations]. *Vestn Ross Akad Med Nauk* 2007;3-11.

[53] Olesen MS, Yuan L, Liang B, Holst AG, Nielsen N, Nielsen JB, Hedley PL, Christiansen M, Olesen SP, Haunso S, Schmitt N, Jespersen T, Svendsen JH. High prevalence of long QT syndrome-associated SCN5A variants in patients with early-onset lone atrial fibrillation. *Circ Cardiovasc Genet* 2012;5:450-9.

[54] Risgaard B, Jabbari R, Refsgaard L, Holst AG, Haunso S, Sadjadieh A, Winkel BG, Olesen MS, Tfelt-Hansen J. High prevalence of genetic variants previously associated with Brugada syndrome in new exome data. *Clin Genet* 2013;84:489-95.

[55] Albert CM, Nam EG, Rimm EB, Jin HW, Hajjar RJ, Hunter DJ, MacRae CA, Ellinor PT. Cardiac sodium channel gene variants and sudden cardiac death in women. *Circulation* 2008;117:16-23.

[56] Clendenen N, Cannon AD, Porter S, Robards CB, Parker AS, Clendenen SR. Whole-exome sequencing of a family with local anesthetic resistance. *Minerva Anestesiol* 2016;82:1089-97.

[57] Koval OM, Snyder JS, Wolf RM, Pavlovicz RE, Glynn P, Curran J, Leymaster ND, Dun W, Wright PJ, Cardona N, Qian L, Mitchell CC, Boyden PA, Binkley PF, Li C, Anderson ME, Mohler PJ, Hund TJ. Ca<sup>2+</sup>/calmodulin-dependent protein kinase II-based regulation of voltage-gated Na<sup>+</sup> channel in cardiac disease. *Circulation* 2012;126:2084-94.

- [58] Ortiz-Bonnin B, Rinne S, Moss R, Streit AK, Scharf M, Richter K, Stober A, Pfeufer A, Seemann G, Kaab S, Beckmann BM, Decher N. Electrophysiological characterization of a large set of novel variants in the SCN5A-gene: identification of novel LQTS3 and BrS mutations. *Pflugers Arch* 2016;468:1375-87.
- [59] Paulussen A, Matthijs G, Gewillig M, Verhasselt P, Cohen N, Aerssens J. Mutation analysis in congenital Long QT Syndrome--a case with missense mutations in KCNQ1 and SCN5A. *Genet Test* 2003;7:57-61.
- [60] Tester DJ, Valdivia C, Harris-Kerr C, Alders M, Salisbury BA, Wilde AA, Makielski JC, Ackerman MJ. Epidemiologic, molecular, and functional evidence suggest A572D-SCN5A should not be considered an independent LQT3-susceptibility mutation. *Heart Rhythm* 2010;7:912-9.
- [61] Marjamaa A, Newton-Cheh C, Porthan K, Reunanen A, Lahermo P, Vaananen H, Jula A, Karanko H, Swan H, Toivonen L, Nieminen MS, Viitasalo M, Peltonen L, Oikarinen L, Palotie A, Kontula K, Salomaa V. Common candidate gene variants are associated with QT interval duration in the general population. *J Intern Med* 2009;265:448-58.
- [62] Abbott GW, Sesti F, Splawski I, Buck ME, Lehmann MH, Timothy KW, Keating MT, Goldstein SA. MiRP1 forms IKr potassium channels with HERG and is associated with cardiac arrhythmia. *Cell* 1999;97:175-87.
- [63] Gouas L, Nicaud V, Chaouch S, Berthet M, Forhan A, Tichet J, Tiret L, Balkau B, Guicheney P. Confirmation of associations between ion channel gene SNPs and QTc interval duration in healthy subjects. *Eur J Hum Genet* 2007;15:974-9.
- [64] Priori SG, Napolitano C, Memmi M, Colombi B, Drago F, Gasparini M, DeSimone L, Coltorti F, Bloise R, Keegan R, Cruz Filho FE, Vignati G, Benatar A, DeLogu A. Clinical and molecular characterization of patients with catecholaminergic polymorphic ventricular tachycardia. *Circulation* 2002;106:69-74.
- [65] Xiong HY, Alipanahi B, Lee LJ, Bretschneider H, Merico D, Yuen RK, Hua Y, Gueroussov S, Najafabadi HS, Hughes TR, Morris Q, Barash Y, Krainer AR, Jovic N, Scherer SW, Blencowe BJ, Frey BJ. RNA splicing. The human splicing code reveals new insights into the genetic determinants of disease. *Science* 2015;347:1254806.
- [66] Anderson CL, Kuzmicki CE, Childs RR, Hintz CJ, Delisle BP, January CT. Large-scale mutational analysis of Kv11.1 reveals molecular insights into type 2 long QT syndrome. *Nat Commun* 2014;5:5535.
- [67] Hedley PL, Jorgensen P, Schlamowitz S, Wangari R, Moolman-Smook J, Brink PA, Kanters JK, Corfield VA, Christiansen M. The genetic basis of long QT and short QT syndromes: a mutation update. *Hum Mutat* 2009;30:1486-511.
- [68] Moss AJ, Shimizu W, Wilde AA, Towbin JA, Zareba W, Robinson JL, Qi M, Vincent GM, Ackerman MJ, Kaufman ES, Hofman N, Seth R, Kamakura S, Miyamoto Y, Goldenberg I, Andrews ML, McNitt S. Clinical aspects of type-1 long-QT syndrome by location, coding type, and biophysical function of mutations involving the KCNQ1 gene. *Circulation* 2007;115:2481-9.
- [69] Riobello C, Gomez J, Gil-Pena H, Tranche S, Reguero JR, de la Hera JM, Delgado E, Calvo D, Moris C, Santos F, Coto-Segura P, Iglesias S, Alonso B, Alvarez V, Coto E. KCNQ1 gene variants in the risk for type 2 diabetes and impaired renal function in the Spanish Renastur cohort. *Mol Cell Endocrinol* 2016;427:86-91.
- [70] Shamgar L, Ma L, Schmitt N, Haitin Y, Peretz A, Wiener R, Hirsch J, Pongs O, Attali B. Calmodulin is essential for cardiac IKS channel gating and assembly: impaired function in long-QT mutations. *Circ Res* 2006;98:1055-63.
- [71] Zareba W, Moss AJ, Sheu G, Kaufman ES, Priori S, Vincent GM, Towbin JA, Benhorin J, Schwartz PJ, Napolitano C, Hall WJ, Keating MT, Qi M, Robinson J, Andrews ML, International Lqts Registry UoRRNY. Location of mutation in the KCNQ1 and phenotypic presentation of long QT syndrome. *J Cardiovasc Electrophysiol* 2003;14:1149-53.
- [72] Baskar S, Ackerman MJ, Clements D, Mayuga KA, Aziz PF. Compound heterozygous mutations in the SCN5A-encoded Nav1.5 cardiac sodium channel resulting in atrial standstill and His-Purkinje system disease. *J Pediatr* 2014;165:1050-2.
- [73] Benson DW, Wang DW, Dymont M, Knilans TK, Fish FA, Strieper MJ, Rhodes TH, George AL, Jr. Congenital sick sinus syndrome caused by recessive mutations in the cardiac sodium channel gene (SCN5A). *J Clin Invest* 2003;112:1019-28.

- [74] Beyder A, Mazzone A, Strega PR, Tester DJ, Saito YA, Bernard CE, Enders FT, Ek WE, Schmidt PT, Dlugosz A, Lindberg G, Karling P, Ohlsson B, Gazouli M, Nardone G, Cuomo R, Usai-Satta P, Galeazzi F, Neri M, Portincasa P, Bellini M, Barbara G, Camilleri M, Locke GR, 3rd, Talley NJ, D'Amato M, Ackerman MJ, Farrugia G. Loss-of-function of the voltage-gated sodium channel NaV1.5 (channelopathies) in patients with irritable bowel syndrome. *Gastroenterology* 2014;146:1659-68.
- [75] Butters TD, Aslanidi OV, Inada S, Boyett MR, Hancox JC, Lei M, Zhang H. Mechanistic links between Na<sup>+</sup> channel (SCN5A) mutations and impaired cardiac pacemaking in sick sinus syndrome. *Circ Res* 2010;107:126-37.
- [76] Celestino-Soper PB, Doytchinova A, Steiner HA, Uradu A, Lynnes TC, Groh WJ, Miller JM, Lin H, Gao H, Wang Z, Liu Y, Chen PS, Vatta M. Evaluation of the Genetic Basis of Familial Aggregation of Pacemaker Implantation by a Large Next Generation Sequencing Panel. *PLoS One* 2015;10:e0143588.
- [77] Gui J, Wang T, Jones RP, Trump D, Zimmer T, Lei M. Multiple loss-of-function mechanisms contribute to SCN5A-related familial sick sinus syndrome. *PLoS One* 2010;5:e10985.
- [78] Lawrence L, Sincan M, Markello T, Adams DR, Gill F, Godfrey R, Golas G, Groden C, Landis D, Nehrebecky M, Park G, Soldatos A, Tifft C, Toro C, Wahl C, Wolfe L, Gahl WA, Boerkoel CF. The implications of familial incidental findings from exome sequencing: the NIH Undiagnosed Diseases Program experience. *Genet Med* 2014;16:741-50.
